# Supplementary material
Source: Springer Nature journal article supplement (https://www.springermedizin.de/resource/supplementary/12874_2012_943_MOESM3_ESM.pdf/9433210)
Supplement: MOESM3 [file 9433210]

**Protocol Identifier  
SCO114293**

[Link to video of case 4](#)

**Assessors Assessment Form**

Assessor Identifier   
 Physician Identifier   
 Consultation

| <b>Case: 4</b>                       | <b>identified</b>              | <b>addressed</b>               | <b>Score</b>                    |
|--------------------------------------|--------------------------------|--------------------------------|---------------------------------|
| Identifies continued smoking         | <input type="text" value="2"/> | <input type="text" value="2"/> | <input type="text" value="4"/>  |
| Manages CV risk                      | <input type="text" value="2"/> | <input type="text" value="1"/> | <input type="text" value="3"/>  |
| Identifies restriction in activities | <input type="text" value="0"/> | <input type="text" value="1"/> | <input type="text" value="1"/>  |
| Identify poor exercise regimen       | <input type="text" value="1"/> | <input type="text" value="1"/> | <input type="text" value="2"/>  |
| Identify poor treatment compliance   | <input type="text" value="2"/> | <input type="text" value="2"/> | <input type="text" value="4"/>  |
| <b>Total Score (A / 20)</b>          |                                |                                | <input type="text" value="14"/> |

|                            | <b>Score</b><br>0 = Not None<br>1 = Some<br>2 = High |
|----------------------------|------------------------------------------------------|
| Review of cough            | <input type="text" value="2"/>                       |
| Review of mucus            | <input type="text" value="2"/>                       |
| Review of chest tightening | <input type="text" value="1"/>                       |
| Review of breathlessness   | <input type="text" value="2"/>                       |
| Review of daily activities | <input type="text" value="2"/>                       |
| Review of confidence       | <input type="text" value="0"/>                       |
| Review of sleep            | <input type="text" value="0"/>                       |
| Review of energy levels    | <input type="text" value="0"/>                       |
| Review of exacerbations    | <input type="text" value="0"/>                       |
| Review of smoking status   | <input type="text" value="2"/>                       |
| <b>Total (B / 20)</b>      | <input type="text" value="11"/>                      |

**ASSESSMENT SCORE (A + B):**

**TIME TAKEN FOR CONSULTATION:**

**DIAGNOSIS GIVEN BY PHYSICIAN:**

**DIAGNOSIS SCORE (0 = poor, 1 = acceptable, 2 = accurate):**

**OVERALL ASSESSMENT GRADING (0 = very poor, 1 = poor, 2 = good, 3 = very good):**
